# Supplementary material for: Mapping the global distribution of invasive pest Drosophila suzukii and parasitoid Leptopilina japonica: implications for biological control
Source: PeerJ. 2023 Apr 24;11:e15222. doi: 10.7717/peerj.15222 (PMC10135410; doi:10.7717/peerj.15222)
Supplement: File S1 — Presence points of D. suzukii used for global-scale ecological niche modeling [file peerj-11-15222-s001.xlsx]

## Sheet: D.suzukii_Records
Occurrence records of D. suzukii
Longitude	Latitude	Database	ID/References
9.61449	46.1361	GBIF	3802475405
15.8699	46.4348	GBIF	3874804308
1.45074	52.7935	GBIF	3303868150
-123.299	43.4218	INAT	85932006
-95.5765	28.9151	GBIF	3325819125
-73.967	40.6713	GBIF	3335100705
-96.772	46.8283	GBIF	3337440798
-82.1132	36.3809	GBIF	3338087850
-72.287	44.2526	GBIF	3399429925
-89.9488	43.3378	INAT	112542240
-72.977	43.6313	INAT	93262492
-8.72246	39.7661	GBIF	3385094831
-64.7278	44.3746	GBIF	3391287590
-78.6408	45.5498	INAT	94099535
-70.1444	44.6689	GBIF	3391695532
-76.4794	42.4464	GBIF	3398964158
-85.6526	44.9675	GBIF	3399235712
12.9942	50.7462	GBIF	3406388364
-76.5646	45.4495	GBIF	3416183874
34.1417	44.9447	GBIF	3415841730
-81.8653	36.166	INAT	100723648
-58.4437	-34.5385	GBIF	3456957667
-158.185	21.5466	GBIF	3455569744
-92.621	16.7412	INAT	103799511
-3.22026	55.9204	GBIF	3468548916
36.3861	-0.838278	GBIF	3443522839
12.5522	55.69	GBIF	2579403437
-47.8526	-15.6711	GBIF	2980799424
-96.3415	42.4722	GBIF	3301863403
9.92772	53.6251	GBIF	3388845593
-122.571	45.5385	GBIF	2862486044
-65.8273	45.5214	GBIF	2868366610
-79.7696	43.6895	GBIF	3090680476
-97.6985	30.3128	GBIF	2963885000
-119.627	49.4905	GBIF	62764766
11.3341	47.7612	GBIF	3044921507
6.26585	58.3436	GBIF	3070127574
7.15102	51.946	GBIF	3388754723
-86.3297	39.8489	GBIF	63216523
9.36799	58.8738	GBIF	2985203313
11.9235	57.7438	GBIF	2994217599
2.15703	48.9331	GBIF	3008422677
-83.4222	33.9588	GBIF	3008441970
13.4535	42.3369	INAT	66741095
9.9491	51.5269	INAT	63178831
-1.19015	48.4441	INAT	32118928
-80.5573	43.4797	GBIF	2423221466
-76.496	44.225	GBIF	2445162493
120.891	31.4167	GBIF	3351740364
-5.94158	54.5548	GBIF	3303867493
-8.23013	40.6535	INAT	87962264
-25.2393	37.8148	INAT	35212011
16.3364	48.253	INAT	9835386
9.53638	48.1148	GBIF	1849315663
5.88511	43.9161	GBIF	3475686335
15.47	59.6143	GBIF	2246347691
-70.2295	43.6399	GBIF	1901068855
13.6284	46.7865	GBIF	2573790304
-68.2132	-38.9477	GBIF	3032892898
-71.62	-46.55	GBIF	3351472229
-68.54	-31.54	GBIF	3032863843
-95.476	30.152	GBIF	2805275483
127.754	34.6808	GBIF	3444235913
11.485	48.165	GBIF	3441417054
15.15	37.76	GBIF	3443452821
-79.2717	40.1603	GBIF	1703170638
-66.1965	45.3117	GBIF	2251380860
10.8215	59.9455	GBIF	1980995245
131.975	43.4858	GBIF	2979445198
-81.81	45.74	GBIF	1841518588
-119.45	49.86	GBIF	1841518641
10.3546	47.4215	GBIF	3442048160
127.66	37.8247	GBIF	3444574307
-75.86	44.45	GBIF	1842484611
126.678	35.2953	GBIF	3444542170
-120.533	50.672	GBIF	1415915989
-80.95	43.74	GBIF	1416180274
-88.9304	37.3763	INAT	418538
-83.4986	35.6859	GBIF	1415231710
-118.86	34.23	GBIF	3348742770
-120.65	35.62	GBIF	3348790797
-117.837	33.6542	GBIF	2898520749
-84.4908	34.2368	INAT	129457034
-60.166	46.1256	INAT	129438433
-80.4383	37.211	GBIF	3881569542
9.44211	51.2323	INAT	127132156
-77.8574	40.793	INAT	59735669
-85.973	32.6851	INAT	126261770
115.572	39.8373	INAT	116044165
-120.38	47.5419	INAT	115777024
-84.3277	33.5913	INAT	112173587
-75.6423	35.9906	INAT	111243500
-107.441	24.8105	INAT	106403587
-99.8281	50.5591	INAT	105815056
106.791	10.7839	INAT	105761389
-122.964	43.9909	INAT	104681180
-89.5492	38.4241	INAT	103936461
15.5229	46.6564	INAT	103191613
-79.8696	40.5329	INAT	103144270
-72.5225	42.4367	INAT	100745392
-84.2488	33.9491	INAT	100594693
21.1893	52.2303	INAT	100407695
-73.316	43.8937	INAT	99647173
-81.36	40.8573	INAT	99285992
-73.6448	44.577	INAT	98913904
11.8808	47.2349	INAT	98651044
-85.677	42.9203	INAT	97854294
-82.5113	41.9262	INAT	97847368
-67.4602	44.5981	INAT	97571465
-121.647	36.7789	INAT	97036226
-63.6874	44.7233	INAT	94166307
-81.326	44.8752	INAT	93928218
-114.321	48.233	INAT	93748312
-88.987	40.5118	INAT	93216090
-89.5266	44.4723	INAT	93021169
-80.4582	42.6998	INAT	92791238
5.68657	45.1979	INAT	92208429
9.32912	41.5886	INAT	92202880
-84.4782	42.3376	INAT	89277484
-72.6892	-36.5673	INAT	89153933
-76.2609	44.7695	GBIF	3333289146
103.577	31.4768	INAT	88098000
-116.992	32.6708	INAT	87479788
-76.2854	41.3831	INAT	71550631
-75.8884	41.245	INAT	71064214
-157.787	21.3249	INAT	70653425
-123.345	48.4278	INAT	67059315
-75.6686	45.4219	INAT	65494386
-80.7973	35.1831	INAT	63703401
-82.7893	42.214	INAT	62952105
-78.8514	41.9838	INAT	58826178
-82.8217	39.8272	INAT	58196065
-81.3269	42.9851	INAT	58075996
-81.4959	41.138	INAT	58025443
-79.1138	35.7378	INAT	57452722
-72.3693	43.7517	INAT	57114871
2.47663	50.7889	INAT	56732752
-79.8802	41.3249	INAT	55821603
-87.9301	41.9931	INAT	55600254
11.4911	46.5323	INAT	54294207
-42.8724	-20.7578	INAT	51898401
-8.75983	37.632	INAT	46758632
16.5809	38.9597	INAT	44278935
-89.3151	41.1343	INAT	42805389
-3.35564	40.487	INAT	37992777
0.597266	49.6161	INAT	36967685
-120.495	37.3268	INAT	35175288
-78.874	36.1101	INAT	34617631
-87.7822	42.7567	INAT	33887261
-123.852	46.1419	INAT	32172001
-93.1725	44.9461	INAT	29024225
-122.791	44.9944	INAT	29017206
-8.2439	37.1271	INAT	18530358
-97.2326	32.9607	INAT	17206945
-120.225	34.862	INAT	9974723
-8.48489	41.1593	INAT	9396661
-94.82	34.2207	INAT	8168269
6.57648	46.5199	INAT	7517639
-80.1285	35.9309	INAT	7111451
-95.4573	29.7968	INAT	5811622
-95.998	41.2524	INAT	4446212
-88.1751	42.6262	INAT	4227912
-58.1186	-31.3773	GBIF	3032813925
-68.83	-32.89	GBIF	3032830822
-92.4466	38.9462	GBIF	1677333141
48.4256	-18.9484	GBIF	1415356801
-66.9583	45.1782	INAT	96724812
9.37435	51.8212	INAT	60241621
12.368	51.3408	INAT	36832511
-80.8466	40.2964	INAT	33998898
117.167	31.9167	CABI	EPPO (2022)
116.397	39.9169	CABI	DAFF(2013)
109.75	19.25	CABI	EPPO (2022)
111.75	27.6667	CABI	CABI and EPPO (2016)
122.667	41.25	CABI	CABI and EPPO (2016)
118.25	36.3333	CABI	CABI and EPPO (2016)
112.25	37.6667	CABI	CABI and EPPO (2016)
43.4999	42	CABI	EPPO (2022)
76.7778	30.7278	CABI	CABI and EPPO (2016)
76.6667	33.9167	CABI	CABI and EPPO (2016)
75.8333	14.6667	CABI	EPPO (2022)
80.75	27.25	CABI	CABI and EPPO (2016)
139.753	35.6854	CABI	CABI and EPPO (2016)
130.991	32.4294	CABI	CABI and EPPO (2016)
17.8333	44.25	CABI	CABI and EPPO (2016)
25.25	42.6667	CABI	CABI and EPPO (2016)
24.895	35.1559	CABI	CABI and EPPO (2016)
12.8333	42.8333	CABI	CABI and EPPO (2016)
14.25	37.75	CABI	CABI and EPPO (2016)
-8.13057	39.6945	CABI	CABI and EPPO (2016)
45.62	59.25	CABI	CABI (2022)
45.34	48.76	CABI	EPPO (2022)
-2.69531	54.7584	CABI	CABI and EPPO (2016)
-117.469	52.2833	CABI	CABI and EPPO (2016)
-84.4998	49.2501	CABI	CABI and EPPO (2016)
-63.2984	46.3981	CABI	CABI and EPPO (2016)
-156.386	20.7878	CABI	CABI and EPPO (2016)
-94.2506	46.2502	CABI	CABI and EPPO (2016)
-71.4998	43.667	CABI	CABI and EPPO (2016)
19.4832	44.4746	__	Toševski et al. 2014
20.3772	44.8553	__	Toševski et al. 2014
18.6334	47.2415	__	Lengyel et al. 2015
17.2596	47.8428	__	Lengyel et al. 2015
16.6272	40.8783	__	Antonacci et al. 2017
-49.4922	-28.6356	__	Deprá et al. 2014
-52.1719	-27.7156	__	Deprá et al. 2014
-50.2781	-29.8842	__	Deprá et al. 2014
0.633333	40.95	__	Calabria et al. 2012
7.26667	44.1167	__	Calabria et al. 2012
5.41667	43.65	__	Calabria et al. 2012
10.4333	43.75	__	Calabria et al. 2012
-118.341	33.8253	__	Castrezana et al. 2010
-56.1182	-34.8825	__	González et al. 2015
-55.5994	-34.6713	__	González et al. 2015
-96.9285	19.444	__	Reyes and Lira-Noriega (2020)
-102.334	19.9943	__	Reyes and Lira-Noriega (2020)
-98.7932	18.7724	__	Bautista-Martínez et al. 2017
-65.6695	-39.2888	__	Cichón et al. 2015
13.3333	47.3333	__	Lethmayer 2011
17.6816	43.218	__	Ostojić et al (2014)
-51.34	-29.12	__	Andreazza et al. 2016
-47.59	-15.47	__	Andreazza et al. 2017
-52.27	-31.46	__	Andreazza et al. 2017
-50.16	-29.54	__	Andreazza et al. 2017
-43.11	-22.31	__	Andreazza et al. 2017
-51.12	-26.13	__	Andreazza et al. 2017
-52.3475	-31.7684	__	Wollmann et al. 2016
-49.56	-28.18	__	Andreazza et al. 2017
-54.57	-28.24	__	Poppe et al. 2016
22.6939	42.2869	__	NPPO Bulgaria 2015
24.75	42.15	__	NPPO Bulgaria 2015
-73.4333	45.2167	__	Saguez et al. 2013
127.667	47.8333	__	Kai et al. 1993
126.167	43.6666	__	Kai et al. 1993
110.462	21.6662	__	Kai et al. 1993
118.419	33.4742	__	Kai et al. 1993
115.767	27.6333	__	Kai et al. 1993
115.667	24.1675	__	Kai et al. 1993
110.383	23.55	__	Kai et al. 1993
102.843	31.4568	__	Kai et al. 1993
113.264	23.1291	__	Kai et al. 1993
117.843	26.545	__	Toda 1991; Kai et al. 1993
121.467	31.2333	__	Toda 1991; Kai et al. 1993
116.41	39.32	__	Fraimout et al. 2017
121.33	29.54	__	Fraimout et al. 2017
17.687	42.8542	__	Bjeliš et al. 2015
15.4626	44.21	__	Bjeliš et al. 2015
33.3977	35.1884	__	NPPO Cyprus 2017
12.833	50.25	__	NPPO Czech Republic 2014
15.12	49.59	__	Březíková et al (2014)
14.35	49.22	__	Březíková et al (2014)
13.34	49.53	__	Březíková et al (2014)
11.2961	55.2523	__	Mathiasen 2015
12.2218	55.3108	__	Reyes and Lira-Noriega (2020)
10.7771	54.8412	__	Reyes and Lira-Noriega (2020)
12.2829	55.9565	__	Reyes and Lira-Noriega (2020)
3.8167	43.5833	__	Calabria et al. 2012
1.16	44.25	__	Seigle Vatte 2010
3.17	48.59	__	Seigle Vatte 2011
2.8231	49.415	__	Poyet et al. 2013
-0.3414	44.5328	__	Rouzes et al. 2012
2.23	49.51	__	Mazzetto et al. 2015
3.53	43.36	__	Asplen et al. 2015
0.24	44.51	__	Cattel et al. 2016
9.28	42.21	__	Cattel et al. 2016
9.6593	47.582	__	Vogt et al. 2012
23.58	35.28	__	Garantonakis et al. 2016
17.5242	46.6215	__	Lengyel et al. 2015
16.7559	46.4317	__	Lengyel et al. 2015
16.44	46.26	__	Lengyel et al. 2015
17.16	47.51	__	Lengyel et al. 2015
21.43	47.57	__	Kiss et al. 2016
74.857	32.7266	__	Bhagat 2014
75.65	12.29	__	Guruprasad et al. 2015
77.34	28.43	__	Sarswat et al. 2016
78.48	30.13	__	Sarswat et al. 2015
49.3205	36.6668	__	Parchami-Araghi et al. 2015
-6.2597	53.3478	__	NPPO Ireland 2015
12.2667	46.2667	__	Calabria et al. 2012
18.5908	42.4426	__	Radonjić and Hrnčic, 2015
18.8458	43.3475	__	Radonjić and Hrnčic, 2015
20.6758	51.8496	__	Łabanowska and Piotrowski, 2015
17.6741	52.1641	__	Łabanowska and Piotrowski, 2015
15.458	51.8804	__	Łabanowska and Piotrowski, 2015
-17.1475	32.7153	__	Rego et al. 2017; Cravo 2015
25.7665	44.1504	__	Chireceanu et al. 2015
26.298	44.1557	__	Chireceanu et al. 2015
133.524	43.6468	__	Storozhenko et al. 2003
7.21	47.22	__	Fraimout et al. 2017
15.1667	46.25	__	Seljak 2011
13.676	45.5309	__	Cattel et al. 2016
2.622	41.6208	__	Gabarra et al. 2014
-4.4167	36.7167	__	Calabria et al. 2012
-0.4833	39.5333	__	Calabria et al. 2012
-0.6333	40.95	GBIF	1010667565
0.38	40.57	__	Calabria et al. 2012
2.55	42.14	__	Arnó et al. 2016
1.58	41.21	__	Arnó et al. 2016
14.1625	55.5103	__	Manduric 2017
14.6845	58.3737	__	Manduric 2017
-149.444	-17.646	__	IPPC 2017
-86.7503	32.7504	__	Burrack et al. 2012
-119.751	37.2502	__	Burrack et al. 2012
-82.3583	27.9695	__	Bolda et al. 2010
-89.7504	32.7504	__	Burrack et al. 2012
-123.698	44.2161	__	Stacconi et al. 2013
-123.263	44.6283	__	Stacconi et al. 2013
-121.548	45.6868	__	Shearer et al. 2016
-86.2503	35.7503	__	Burrack et al. 2012
-99.2506	31.2504	__	Burrack et al. 2012
-111.751	39.2502	__	Burrack et al. 2012
-83.21	33.57	__	Jaramillo et al. 2015
-78.38	35.47	__	Fraimout et al. 2017
-87.34	33.13	__	Bombin and Reed 2016

## Sheet: References
References
Andreazza F, Haddi K, Oliveira EE, Ferreira JAM. 2016. Drosophila suzukii (Diptera: Drosophilidae) arrives at Minas Gerais state, a main strawberry production region in Brazil. Florida Entomologist 99: 796–798.
Andreazza F, Bernardi D, dos Santos RSS, Garcia FRM , Oliveira EE, Botton M, Nava DE. 2017. Drosophila suzukii in Southern Neotropical region: current status and future perspectives. Neotropical Entomology 46:591–605.
Antonacci R, Tritto P, Cappucci U, Fanti L, Piacentini L, Berloco M. 2017. Drosophilidae monitoring in Apulia (Italy) reveals Drosophila suzukii as one of the four most abundant species. Bulletin of Insectology 70:139-146.
Arnó J, Solà M, Riudavets J, Gabarra R. 2016. Population dynamics, non-crop hosts, and fruit susceptibility of Drosophila suzukii in northeast Spain. Journal of Pest Science 89:713–723.
Asplen MK, Anfora G, Biondi A, Choi D-S, Chu D, Daane KM, Gibert P, Gutierrez AP, Hoelmer KA, Hutchison WD, Isaacs R, Jiang Z-L, Kárpáti Z, Kimura MT, Pascual M, Philips CR, Plantamp C, Ponti L, Vétek G, Vogt H, Walton VM, Yu Y, Zappalà L, Desneux N. 2015. Invasion biology of spotted wing Drosophila (Drosophila suzukii): a global perspective and future priorities. Journal of Pest Science 88:469–4…
Bautista-Martínez N, Riquelme CPI, Bautista EL, Moreno LJV, Ávila C de JG. 2017. Presence of Drosophilidae (Diptera: Ephydroidea) flies associated with fig fruits in Morelos, Mexico. Florida Entomologist 100:813-816.
Bhagat RC .2014. Fruit fly fauna (Insecta : Diptera) of Jammu & Kashmir Himalaya, India: check list and biodiversity. International Journal of Food, Agriculture and Veterinary Sciences 4:18–23.
Bjeliš M, Buljubašić I, Popović L, Masten Milek T. 2015. Spread of the spotted wing Drosophila – Drosophila suzukii (Diptera, Drosophlidae) and new distribution records in Dalmatia region of Croatia. EPPO Bulletin 45:214–217.
Bolda MP, Goodhue RE, Zalom FG. 2010. Spotted Wing Drosophila: potential economic impact of a newly established pest. Agricultural and Resource Economics Update 13:5–8.
Bombin A, Reed LK. 2016. The changing biodiversity of Alabama Drosophila: important impacts of seasonal variation, urbanization, and invasive species. Ecology and Evolution 6:7057–7069.
Březíková M, Dvořák L, Máca J. 2014. Faunistic records from the Czech Republic - 367. Diptera: Drosophilidae. Klapalekiana 50: 247–248.
Burrack HJ, Smith JP, Pfeiffer DG, Koeher G, Laforest J. 2012. Using volunteer-based networks to track Drosophila suzukii (Diptera: Drosophilidae) an invasive pest of fruit crops. Journal of Integrated Pest Management 4:1–5.
Calabria G, Calabria G, Máca J, Bächli G, Serra L, Pascual M. 2012. First records of the potential pest species Drosophila suzukii (Diptera: Drosophilidae) in Europe. Journal of Applied Entomology 136: 139–147.
Castrezana S, Faircloth BC, Gowaty PA. 2010. Drosophila collection in Los Angeles, California. Drosophila Information Service 93: 91-93.
Cattel J, Kaur R, Gibert P, Martinez J, Fraimout A, Jiggins F, Andrieux T, Siozios S, Anfora G, Miller W, Rota-Stabelli O, Mouton L. 2016. Wolbachia in European populations of the invasive pest Drosophila suzukii: Regional variation in infection frequencies. PLoS ONE 11: 1–12.
Chireceanu C, Chiriloaie A, Teodoru A. 2015. First record of the spotted wing Drosophila Drosophila suzukii (Diptera: Drosophilidae) in Romania. Romanian Journal for Plant Protection 8: 86–95.
Cichón L, Garrido S, Lago J. 2015. Primera detección de Drosophila suzukii (Matsumura, 1939) (Diptera: Drosophilidae) en frambuesas del Valle de Río Negro, Argentina. In: Libro de Resúmenes del IX Congreso Argentino de Entomología. Posadas, Misiones. 270.
Cravo D. 2015. Drosophila suzukii, a drosófila de asa manchada. Direção Regional de Agricultura e Desenvolvimento Rural. Available at: https://dica.madeira.gov.pt/index.php/producao-vegetal/pragas-e-doencas/1110-Drosophila-suzukii-a-drosofila-de-asa-manchada (Accessed 20 March 2018).
Deprá M, Poppe JL, Schmitz HJ, De Toni DC, Valente VL. 2014. The first records of the invasive pest Drosophila suzukii in the South American continent. Journal of Pest Science 87: 379–383.
Fraimout A, Debat V, Fellous S, Hufbauer RA, Foucaud J, Pudlo P, Marin JM, Price DK, Cattel J, Chen X, Deprá M. 2017. Deciphering the routes of invasion of Drosophila suzukii by means of ABC random forest. Molecular Biology and Evolution 34: 980–996.
Gabarra R, Riudavets J, Rodríguez GA, Pujade-Villar J, Arnó J. 2014. Prospects for the biological control of Drosophila suzukii. BioControl 60: 331–339.
Garantonakis N, Varikou K, Birouraki A. 2016. Spread of Drosophila suzukii in orchards of Crete. Entomologia Generalis 36: 63–70.
González G, Mary AL, Goñi B. 2015. Drosophila suzukii (Matsumura) found in Uruguay. Drosophila Information Service 98:67–75.
Guruprasad BR, Padmaja C, Tangpu V. 2015. Drosophilidae of Bettadapura hill of Mysuru District (Karnataka, India). Drosophila Information Service 98: 61–63.
IPPC 2017. Drosophila suzukii present à Tahiti & Moorea. Official Pest Reports – French Polynesia (Report number PYF 10/2). Available at: https://www.ippc.int/en/countries/french-polynesia/pestreports/2017/07/drosophila-suzukii-present-a-tahiti-moorea/. (Accessed 15 September 2017).
Jaramillo SL, Mehlferber E, Moore PJ. 2015. Life-history trade-offs under different larval diets in Drosophila suzukii (Diptera: Drosophilidae). Physiological Entomology 40:2–9.
Kai H, Zhang W, Carson HL. 1993. The Drosophilidae (Diptera) of Hainan Island (China). Pacific Science 47:319–327.
Kiss B, Kis A, Ká¡kai Ã. 2016. The rapid invasion of spotted wing Drosophila, Drosophila suzukii (Matsumura) (Diptera: Drosophilidae), in Hungary. Phytoparasitica 44: 429–433.
Łabanowska BH, Piotrowski W. 2015. The Spotted Wing Drosophila Drosophila suzukii (Matsumura, 1931) – monitoring and first records In Poland. Journal of Horticultural Research 23: 49–57.
Lengyel GD, Lengyel GD, Orosz S, Kiss B, Lupták R, Kárpáti Z. 2015. New records and present status of the invasive spotted wing Drosophila, Drosophila suzukii (Matsumura, 1931) (Diptera) in Hungary. Acta Zoologica Academiae Scientiarum Hungaricae 61:73–80.
Lethmayer C. 2011. Gefhrliche fliegen für Äpfel & Co. Bessers Obst 12:4–5.
Manduric S. 2017. Drosophila suzukii – experiences from the fly’s northernmost inhabited region (from the first record to two years after the detection). IOBC-WPRS Bulletin 123:150–156.
Mathiasen H. 2015. Nye fund af pletvingefrugtfluen i 2015. Jordbærnyt - GartneriRådgivningen 12:2–4.
Mazzetto F, Mazzetto F, Pansa MG, Ingegno BL, Tavella L, Alma A. 2015. Monitoring of the exotic fly Drosophila suzukii in stone, pome and soft fruit orchards in NW Italy. Journal of Asia-Pacific Entomology 18: 321–329.
NPPO Bulgaria. 2015. First report of Drosophila suzukii in Bulgaria. EPPO Reporting Service 1:6.
NPPO Cyprus. 2017. First reports of Drosophila suzukii and Zaprionus indianus in Cyprus, and confirmation of the presence of Z. tuberculatus. EPPO Reporting Service 4:81.
NPPO Czech Republic. 2014. First report of Drosophila suzukii in the Czech Republic. EPPO Reporting Service 11:209.
NPPO Ireland. 2015. First report of Drosophila suzukii in Ireland. EPPO Reporting Service 12:1
Ostojić I, Zovko M, Petrović D. 2014. First record of spotted wing Drosophila suzukii (Matsumura, 1931) in Bosnia and Herzegovina. Radovi Poljoprivrednog Fakulteta Univerziteta u Sarajevu (Works of the Faculty of Agriculture University of Sarajevo) 59: 127–133.
Parchami-Araghi M, Gilasian E, Keyhanian AA. 2015. Spotted Wing Drosophila, Drosophila suzukii (Matsumura) (Dip.: Drosophilidae), an invasive fruit pest new to the Middle East and Iran. Drosophila Information Service, 98, 59–60.
Poppe JL, Schmitz HJ, Valente VLS. 2016. Changes in the structure of drosophilidae (Diptera) assemblages associated with contrasting environments in the pampas biome across temporal and spatial scales. Annals of the Entomological Society of America 109:567–573.
Poyet M, Havard S, Prevost G, Chabrerie O, Doury G, Gibert P, Eslin P. 2013. Resistance of Drosophila suzukii to the larval parasitoids Leptopilina heterotoma and Asobara japonica is related to haemocyte load. Physiological Entomology 38:45–53.
Radonjić S, Hrnčic S. 2015. First record of spotted wing Drosophila Drosophila suzukii (Diptera: Drosophilidae) in Montenegro. Journal of Pesticides & Phytomedicine 30: 35–40.
Rego C, Aguiar AF, Cravo D, Boieiro M. 2017. Invasive fruit flies (Diptera: Drosophilidae) meet in a biodiversity hotspot. Journal of the Entomological Research Society 19: 61–69.
Reyes J, Lira-Noriega A. 2020. Current and future global potential distribution of the fruit fly Drosophila suzukii (Diptera: Drosophilidae). The Canadian Entomologist 152:587-599.
Rouzes R, Delbac L, Ravidat ML, Thiéry D. 2012. First occurrence of Drosophila suzukii in the sauterness vineyards. Journal International des Sciences de la Vigne et du Vin 46:145–147.
Saguez J, Lasnier J, Vincent C. 2013. First record of Drosophila Suzukii in Quebec vineyards. Journal International des Sciences de la Vigne et du Vin 47:69–72.
Sarswat M, Singh FR, Chandra SP, Mukul K, Kumar SB. 2015. Diversity and distribution pattern of drosophilids (Diptera, Drosophilidae) along an altitudinal transect in Uttarakhand and its implication in cytogenetics & molecular systematics study. Journal of Entomological Research 39: 311–322.
Sarswat M, Dewan S, Fartyal RS. 2016. Mitochondrial DNA sequence variation in Drosophilid species (Diptera: Drosophilidae) along altitudinal gradient from Central Himalayan region of India. Journal of Genetics 95:357–367.
Seigle Vatte G. 2010. Cultures fruitières. Bulletin de Sante du Vegetal, Rhone-Alpes 2, 1.
Seigle Vatte G. 2011. Bilan des reseaux de piegeage Drosophila suzukii 2011. Bilan Drosophila suzukii Rhone-Alpes, Agricultures and Territoires. Bulletin de Sante du Vegetal 2:1–5.
Seljak G. 2011. Plodova vinska Musica (Drosophila suzukii), nova groznja vinogradnikom in sadjarjem v Sloveniji / Spotted wing Drosophila – Drosophila suzukii (Matsumura), a new pest of berry-fruits in Slovenia. Sad 22:3–5.
Shearer PW, West JD, Walton VM, Brown PH, Svetec N, Chiu JC.2016. Seasonal cues induce phenotypic plasticity of Drosophila suzukii to enhance winter survival. BMC Biology 1–18.
Stacconi MVR, Grassi A, Dalton D, Miller B, Ouantar M, Loni A, Ioriatti C, Walton V, Anfora G. 2013. First field records of Pachycrepoideus vindemiae as a parasitoid of Drosophila suzukii in European and Oregon small fruit production areas. Entomologia, 1, 11–16.
Storozhenko S, Sidorenko VS, Lafer GSh, Cholin SK. 2003. The International Biodiversity Observation Year (IBOY): Insects of forest ecosystems of the Primorye region. In A.I. Kurentsov’s Annual Memorial Meetings, 13. 31–52.
Toda MJ. 1991. Drosophilidae (Diptera) in myanmar (Burma) VII. The Drosophila melanogaster species-group, excepting the D. montium species-subgroup. Oriental Insects, 25, 69–94.
Toševski I, Milenković S, Krstić O, Kosovac A, Jakovljević M, Mitrović M, Cvrković T, Jović J. 2014. Drosophila suzukii (Matsumura, 1931) (Siptera: Srosophilidae): a new invasive pest in Serbia. Zastita bilja 65:99–104.
Vogt H, Hoffmann C, Baufeld P. 2012. Ein neuer schädling, die Kirschessigfliege, Drosophila suzukii (Matsumura), bedroht obst- und weinkulturen. Entomologische Nachrichten und Berichte 56: 191–196.
Wollmann J, Schlesener DC, Ferreira MS, Garcia MS, Costa VA, Garcia FR. 2016. Parasitoids of Drosophilidae with potential for parasitism on Drosophila suzukii in Brazil. Drosophila Information Service 99:38–42.
