# Supplementary material for: Mapping the global distribution of invasive pest Drosophila suzukii and parasitoid Leptopilina japonica: implications for biological control
Source: PeerJ. 2023 Apr 24;11:e15222. doi: 10.7717/peerj.15222 (PMC10135410; doi:10.7717/peerj.15222)
Supplement: File S2 — Presence points of parasitoid L. japonica used for global-scale ecological niche modeling [file peerj-11-15222-s002.xlsx]

## Sheet: L. japonica_Records
Occurrence records of L. japonica
Longitude	Latitude	References
11.1243	46.1817	Puppato et al. (2020)
11.2299	46.046	Puppato et al. (2020)
-122.557	49.2266	Abram et al. (2020)
-121.747	49.342	Abram et al. (2020)
-122.789	49.3	Abram et al. (2020)
-122.306	49.1424	Abram et al. (2020)
-122.073	49.1875	Abram et al. (2020)
-121.434	49.3864	Abram et al. (2020)
-123.318	48.4633	Abram et al. (2020)
139.36	35.63	Girod (2018)
139.767	35.6666	Novković et al. (2011)
121.633	25.0333	Novković et al. (2011)
102.861	24.5063	Giorgini et al. (2019)
103.323	24.8151	Giorgini et al. (2019)
102.89	24.7658	Giorgini et al. (2019)
102.835	25.0986	Giorgini et al. (2019)
122.867	42.4333	Wang et al (2022)
-123.238	49.2503	Abram et al. (2022)
-122.915	49.0847	Abram et al. (2022)
-123.081	49.0849	Abram et al. (2022)
-122.245	49.0352	Abram et al. (2022)
-121.921	49.101	Abram et al. (2022)
102.482	23.7437	Girod (2018)
104.347	23.5542	Girod (2018)
102.715	25.1267	Girod (2018)
104.171	24.655	Girod (2018)
102.432	25.2053	Girod (2018)
116.211	40.035	Girod (2018)
116.069	40.0686	Girod (2018)
107.455	31.2739	Girod (2018)
138.494	36.7189	Girod (2018)

## Sheet: References
References
Abram PK, Franklin MT, Hueppelsheuser T, Carrillo J, Grove E, Eraso P, Acheampong S, Keery L, Girod P, Tsuruda M, Clausen M, Buffington ML, Moffat CE. 2022. Adventive larval parasitoids reconstruct their close association with spotted-wing Drosophila in the invaded North American range. Environmental Entomology 51:670–678. DOI: 10.1093/ee/nvac019.
Abram PK, McPherson AE, Kula R, Hueppelsheuser T, Thiessen J, Perlman SJ, Curtis CI, Fraser JL, Tam J, Carrillo J, Gates M, Scheffer S, Lewis M, Buffington M. 2020. New records of Leptopilina, Ganaspis, and Asobara species associated with Drosophila suzukii in North America, including detections of L. japonica and G. brasiliensis. Journal of Hymenoptera Research 78:1–17. DOI: 10.3897/jhr.78.55026.
Giorgini M, Wang X-G, Wang Y, Chen F-S, Hougardy E, Zhang H-M, Chen Z-Q, Chen H-Y, Liu C-X, Cascone P, Formisano G, Carvalho GA, Biondi A, Buffington M, Daane KM, Hoelmer KA, Guerrieri E. 2019. Exploration for native parasitoids of Drosophila suzukii in China reveals a diversity of parasitoid species and narrow host range of the dominant parasitoid. Journal of Pest Science 92:509–522. DOI: 10.100…
Girod P. 2018. From Asia to Europe, evaluation of parasitoids for the biological control of the invasive fruit pest Drosophila suzukii. Switzerland: University of Neuchâtel.
Novković B, Mitsui H, Suwito A, Kimura MT. 2011. Taxonomy and phylogeny of Leptopilina species (Hymenoptera: Cynipoidea: Figitidae) attacking frugivorous drosophilid flies in Japan, with description of three new species. Entomological Science 14:333–346. DOI: 10.1111/j.1479-8298.2011.00459.x.
Puppato S, Grassi A, Pedrazzoli F, De Cristofaro A, Ioriatti C. 2020. First report of Leptopilina japonica in Europe. Insects 11:611. DOI: 10.3390/insects11090611.
Wang J, Zheng Y, Fan L, Wang W. 2022. Surveys of Drosophila suzukii (Diptera: Drosophilidae) and its host fruits and associated parasitoids in northeastern China. Insects 13:390. DOI: 10.3390/insects13040390.
