# Supplementary material for: Mapping the global distribution of invasive pest Drosophila suzukii and parasitoid Leptopilina japonica: implications for biological control
Source: PeerJ. 2023 Apr 24;11:e15222. doi: 10.7717/peerj.15222 (PMC10135410; doi:10.7717/peerj.15222)
Supplement: File S3 — Country-wise area estimation of potential habitats for both pest and parasitoid at most desirable (E = 5%) and maximum permitted (E = 10%) thresholds. [file peerj-11-15222-s003.xlsx]

## Sheet: D.suzukii_5%
Country	Area (Sq.m)
Afghanistan	1.20756e+11
Albania	2.80197e+10
Algeria	4.44458e+11
Andorra	4.52248e+08
Angola	7.25061e+11
Antigua and Barbuda	3.06015e+08
Argentina	2.61053e+12
Armenia	2.95883e+10
Australia	4.13253e+12
Austria	8.39932e+10
Azerbaijan	8.54702e+10
Bangladesh	1.28942e+11
Belarus	2.07499e+11
Belgium	3.05971e+10
Belize	4.61916e+07
Bhutan	3.89541e+10
Bolivia	4.75959e+11
Bosnia and Herzegovina	5.18245e+10
Botswana	3.94178e+09
Brazil	2.08821e+12
Brazilian Island	2.82494e+06
Bulgaria	1.12514e+11
Burundi	2.58991e+10
Cabo Verde	1.75055e+09
Cambodia	6.25309e+09
Cameroon	2.63836e+10
Canada	2.79373e+12
Central African Republic	3.02493e+09
Chile	5.82097e+11
China	4.48816e+12
Colombia	9.19474e+10
Costa Rica	1.45635e+09
Croatia	5.29328e+10
Cuba	8.13608e+10
Cyprus	5.12247e+09
Cyprus No Mans Area	2.96726e+08
Czechia	7.87589e+10
Democratic Republic of the Congo	4.20375e+11
Denmark	2.02079e+11
Djibouti	1.31375e+10
Dominican Republic	2.11812e+10
East Timor	3.56809e+09
Ecuador	7.52657e+10
Egypt	1.80966e+11
El Salvador	1.13527e+09
Equatorial Guinea	1.41721e+07
Eritrea	3.36803e+10
Estonia	4.43893e+10
eSwatini	1.71118e+10
Ethiopia	4.13797e+11
Finland	3.00806e+11
France	5.62247e+11
Gabon	4.52017e+10
Georgia	6.93011e+10
Germany	3.55684e+11
Ghana	3.32269e+09
Greece	1.23576e+11
Guatemala	2.29135e+10
Guinea	4.19293e+09
Haiti	6.92165e+09
Honduras	5.02256e+10
Hungary	9.3201e+10
Iceland	9.82728e+10
India	1.27481e+12
Indonesia	1.07545e+10
Iran	3.36851e+11
Iraq	3.47095e+10
Ireland	6.66299e+10
Israel	1.34495e+10
Italy	2.95636e+11
Ivory Coast	8.46443e+07
Jamaica	7.65511e+08
Japan	3.57894e+11
Jordan	4.92188e+09
Kazakhstan	2.01132e+11
Kenya	1.81744e+11
Kosovo	1.09131e+10
Kyrgyzstan	9.02561e+10
Laos	1.86149e+11
Latvia	6.41621e+10
Lebanon	9.80004e+09
Lesotho	3.01065e+10
Libya	1.8428e+11
Liechtenstein	1.3725e+08
Lithuania	6.48164e+10
Luxembourg	2.60847e+09
Madagascar	1.87519e+11
Malawi	1.1121e+11
Malta	2.70896e+08
Mauritania	4.20613e+08
Mauritius	1.80279e+09
Mexico	6.91072e+11
Moldova	3.32065e+10
Monaco	3.96398e+06
Montenegro	1.36315e+10
Morocco	3.54223e+11
Mozambique	2.78561e+11
Myanmar	4.45821e+11
Namibia	6.62887e+10
Nepal	1.45625e+11
Netherlands	3.67612e+10
New Zealand	2.17911e+11
Nicaragua	7.9565e+09
Niger	5.28332e+08
Nigeria	1.59342e+10
North Korea	1.20895e+11
North Macedonia	2.53853e+10
Northern Cyprus	2.29099e+09
Norway	2.85817e+11
Oman	2.85525e+10
Pakistan	1.53945e+11
Panama	1.46041e+08
Paraguay	3.41582e+11
Peru	4.95996e+11
Philippines	3.4564e+09
Poland	3.12842e+11
Portugal	8.94632e+10
Republic of Serbia	7.76287e+10
Republic of the Congo	7.21813e+10
Romania	2.35895e+11
Russia	3.71068e+12
Rwanda	2.53051e+10
Saint Kitts and Nevis	1.35336e+08
San Marino	6.03171e+07
Saudi Arabia	4.56291e+10
Slovakia	4.84578e+10
Slovenia	2.02956e+10
Somalia	7.57478e+09
Somaliland	2.47473e+10
South Africa	9.02797e+11
South Korea	9.46529e+10
South Sudan	5.65877e+09
Southern Patagonian Ice Field	1.40891e+09
Spain	5.02619e+11
Sri Lanka	4.24392e+08
Sudan	2.6562e+09
Sweden	4.36539e+11
Switzerland	4.13448e+10
Syria	2.22076e+10
Taiwan	2.48497e+10
Tajikistan	7.39441e+10
Thailand	1.1746e+11
The Bahamas	9.42907e+09
Togo	7.28908e+07
Tunisia	7.8947e+10
Turkey	7.61388e+11
Turkmenistan	5.91068e+10
Uganda	1.40985e+11
Ukraine	5.70441e+11
United Arab Emirates	4.28909e+08
United Kingdom	2.4744e+11
United Republic of Tanzania	5.40639e+11
United States of America	7.2675e+12
Uruguay	1.76466e+11
Uzbekistan	6.40905e+10
Vatican	12203.8
Venezuela	7.60555e+10
Vietnam	2.08079e+11
Western Sahara	4.34763e+08
Yemen	1.4563e+11
Zambia	4.71457e+11
Zimbabwe	1.86694e+11	Total Area (Presence) [Sq.km]	48193572

## Sheet: L.japonica_5%
Country	Area (Sq.m)
Afghanistan	9.39064e+10
Albania	2.79423e+10
Algeria	4.62232e+10
Andorra	4.07849e+08
Angola	6.55275e+11
Argentina	4.87634e+11
Armenia	9.57437e+09
Australia	1.4316e+12
Austria	7.70024e+10
Azerbaijan	2.91463e+10
Bangladesh	8.87689e+10
Belarus	1.31395e+11
Belgium	2.71154e+10
Benin	3.78825e+10
Bhutan	3.47727e+10
Bolivia	3.39435e+09
Bosnia and Herzegovina	3.24492e+10
Botswana	2.95842e+10
Brazil	3.72252e+11
Brazilian Island	2.82462e+06
Bulgaria	1.54389e+09
Burkina Faso	1.60346e+11
Cabo Verde	4.79126e+08
Cambodia	6.72065e+10
Cameroon	1.21551e+11
Canada	5.9832e+11
Central African Republic	1.88972e+11
Chad	4.38402e+11
Chile	2.59357e+11
China	5.04805e+12
Colombia	3.40132e+08
Croatia	4.01058e+10
Cuba	2.05522e+09
Cyprus	4.4274e+09
Cyprus No Mans Area	7.2495e+07
Czechia	6.86657e+10
Democratic Republic of the Congo	1.84424e+11
Denmark	4.084e+11
Djibouti	5.67312e+08
Egypt	1.20085e+08
Equatorial Guinea	1.41721e+07
Estonia	4.39425e+10
Ethiopia	5.66319e+10
Fiji	1.03039e+10
Finland	9.35327e+10
France	2.82968e+11
Gabon	1.22213e+09
Gambia	9.95577e+09
Georgia	6.16053e+10
Germany	1.92736e+11
Ghana	1.70405e+10
Greece	8.4345e+10
Guatemala	2.06423e+09
Guinea	1.66144e+11
Guinea-Bissau	1.48255e+10
Hungary	7.04859e+09
Iceland	8.92441e+10
India	2.54037e+12
Iran	7.39679e+10
Iraq	2.94426e+10
Ireland	5.55071e+10
Israel	1.18955e+10
Italy	2.64425e+11
Ivory Coast	2.61082e+10
Japan	3.59985e+11
Jordan	1.93235e+09
Kazakhstan	1.1488e+09
Kosovo	1.76529e+09
Kyrgyzstan	1.48481e+09
Laos	1.67143e+11
Latvia	6.09199e+10
Lebanon	9.0015e+09
Lesotho	3.18959e+08
Liberia	8.0169e+07
Libya	5.69993e+09
Liechtenstein	1.3725e+08
Lithuania	4.07261e+10
Luxembourg	2.60848e+09
Madagascar	1.4729e+11
Malawi	1.12759e+11
Mali	3.83434e+11
Malta	2.70906e+08
Mauritania	3.16311e+10
Mauritius	1.7522e+09
Mexico	4.38842e+11
Moldova	4.81212e+09
Monaco	3.96481e+06
Mongolia	6.88515e+10
Montenegro	1.18362e+10
Morocco	2.72695e+10
Mozambique	2.98361e+11
Myanmar	4.52059e+11
Namibia	5.41612e+10
Nepal	1.22029e+11
Netherlands	1.79224e+10
New Zealand	1.38227e+11
Niger	1.75054e+11
Nigeria	5.64435e+11
North Korea	1.20895e+11
North Macedonia	3.66484e+09
Northern Cyprus	1.41495e+09
Norway	2.53125e+11
Oman	3.48216e+09
Pakistan	1.85792e+11
Paraguay	3.7694e+10
Peru	4.93076e+10
Philippines	7.36891e+09
Poland	2.14149e+11
Portugal	7.37044e+10
Republic of Serbia	8.71372e+09
Republic of the Congo	4.46789e+08
Romania	7.99692e+10
Russia	8.90924e+11
San Marino	6.03173e+07
Senegal	1.27972e+11
Sierra Leone	1.71757e+09
Slovakia	2.5236e+10
Slovenia	1.99316e+10
Somaliland	7.47376e+07
South Africa	7.17065e+09
South Korea	9.46534e+10
South Sudan	5.19196e+10
Spain	1.3623e+11
Sudan	1.95111e+11
Sweden	1.58053e+11
Switzerland	3.73609e+10
Syria	1.47684e+10
Taiwan	3.14183e+10
Tajikistan	3.91946e+10
Thailand	3.48515e+11
The Bahamas	7.8146e+09
Togo	1.08872e+09
Tonga	2.45119e+08
Tunisia	1.07027e+10
Turkey	2.57035e+11
Turkmenistan	1.60829e+08
Ukraine	1.82076e+11
United Arab Emirates	1.55892e+08
United Kingdom	1.36091e+11
United Republic of Tanzania	1.12517e+11
United States of America	2.92847e+12
Uruguay	7.5248e+10
Uzbekistan	1.27531e+10
Vanuatu	1.72561e+09
Vatican	12203.8
Vietnam	2.13852e+11
Zambia	7.11365e+11
Zimbabwe	2.48938e+11	Total Area (Presence) [Sq.km]	2.71693e+07

## Sheet: D.suzukii_10%
Country	Area (Sq.m)
Afghanistan	7.70385e+10
Albania	2.80197e+10
Algeria	2.22597e+11
Andorra	4.52248e+08
Angola	2.09636e+11
Antigua and Barbuda	3.06015e+08
Argentina	2.13668e+12
Armenia	2.75657e+10
Australia	2.99497e+12
Austria	8.39932e+10
Azerbaijan	8.26601e+10
Bangladesh	1.01548e+11
Belarus	2.07499e+11
Belgium	3.05971e+10
Bhutan	3.71123e+10
Bolivia	2.03933e+11
Bosnia and Herzegovina	5.18245e+10
Brazil	1.38557e+12
Brazilian Island	2.82494e+06
Bulgaria	1.12514e+11
Burundi	1.9519e+10
Cabo Verde	6.30748e+08
Cambodia	7.90649e+08
Cameroon	1.809e+09
Canada	2.15527e+12
Chile	4.75909e+11
China	3.86264e+12
Colombia	6.82142e+10
Costa Rica	8.05627e+08
Croatia	5.29328e+10
Cuba	7.02289e+09
Cyprus	3.43388e+09
Cyprus No Mans Area	3.31994e+07
Czechia	7.87589e+10
Democratic Republic of the Congo	1.50484e+11
Denmark	1.305e+11
Djibouti	3.68998e+09
Dominican Republic	9.71996e+09
East Timor	1.68963e+08
Ecuador	6.37853e+10
Egypt	8.04753e+09
El Salvador	4.24435e+08
Equatorial Guinea	1.41721e+07
Eritrea	6.81405e+09
Estonia	4.43893e+10
eSwatini	1.06602e+10
Ethiopia	1.55615e+11
Finland	2.38124e+11
France	5.56671e+11
Gabon	2.55227e+09
Georgia	6.93011e+10
Germany	3.55684e+11
Greece	1.23576e+11
Guatemala	1.67224e+10
Guinea	8.36475e+07
Haiti	9.24349e+08
Honduras	2.1489e+10
Hungary	9.3201e+10
Iceland	9.49785e+10
India	6.85789e+11
Indonesia	1.18363e+09
Iran	1.16131e+11
Iraq	2.10999e+10
Ireland	6.63324e+10
Israel	8.74565e+09
Italy	2.95613e+11
Japan	3.56945e+11
Jordan	5.07556e+08
Kazakhstan	4.15779e+10
Kenya	8.28627e+10
Kosovo	1.09131e+10
Kyrgyzstan	4.33055e+10
Laos	1.24452e+11
Latvia	6.41621e+10
Lebanon	8.68225e+09
Lesotho	3.01065e+10
Libya	3.73283e+10
Liechtenstein	1.3725e+08
Lithuania	6.48164e+10
Luxembourg	2.60847e+09
Madagascar	1.04766e+11
Malawi	7.434e+10
Malta	2.70896e+08
Mauritania	5.3663e+07
Mauritius	9.46374e+07
Mexico	2.96644e+11
Moldova	3.32065e+10
Monaco	3.96398e+06
Montenegro	1.36315e+10
Morocco	1.65794e+11
Mozambique	7.39239e+10
Myanmar	3.7518e+11
Namibia	1.35014e+10
Nepal	1.41915e+11
Netherlands	3.62606e+10
New Zealand	2.12122e+11
Nicaragua	1.36162e+09
Nigeria	5.66668e+08
North Korea	1.18934e+11
North Macedonia	2.53853e+10
Northern Cyprus	4.29384e+08
Norway	2.63208e+11
Oman	1.859e+09
Pakistan	8.31241e+10
Panama	3.76688e+07
Paraguay	2.30965e+11
Peru	4.31001e+11
Philippines	2.52437e+08
Poland	3.12842e+11
Portugal	8.94632e+10
Republic of Serbia	7.76287e+10
Republic of the Congo	6.28359e+09
Romania	2.35895e+11
Russia	2.03391e+12
Rwanda	1.46059e+10
Saint Kitts and Nevis	6.32502e+07
San Marino	6.03171e+07
Saudi Arabia	8.93865e+09
Slovakia	4.84578e+10
Slovenia	2.02956e+10
Somalia	1.09108e+09
Somaliland	2.02016e+09
South Africa	5.91474e+11
South Korea	9.46529e+10
South Sudan	1.12621e+09
Southern Patagonian Ice Field	1.40891e+09
Spain	4.95648e+11
Sweden	3.78205e+11
Switzerland	4.08909e+10
Syria	1.24526e+10
Taiwan	2.06059e+10
Tajikistan	4.55479e+10
Thailand	2.20508e+10
The Bahamas	9.42907e+09
Tunisia	5.32982e+10
Turkey	6.78724e+11
Turkmenistan	4.75825e+09
Uganda	5.15929e+10
Ukraine	5.70441e+11
United Arab Emirates	1.58444e+07
United Kingdom	2.43271e+11
United Republic of Tanzania	1.97482e+11
United States of America	5.75226e+12
Uruguay	1.76466e+11
Uzbekistan	2.25789e+10
Vatican	12203.8
Venezuela	3.58011e+10
Vietnam	1.73719e+11
Western Sahara	3.17915e+07
Yemen	2.08754e+10
Zambia	1.4818e+11
Zimbabwe	7.85232e+10	Total Area (Presence) [Sq.km]	34415113

## Sheet: L. japonica_10%
Country	Area (Sq.m)
Afghanistan	8.71445e+10
Albania	2.781e+10
Algeria	4.30267e+10
Andorra	3.44491e+08
Angola	6.23424e+11
Argentina	3.88534e+11
Armenia	7.33353e+09
Australia	1.28934e+12
Austria	7.31554e+10
Azerbaijan	2.43867e+10
Bangladesh	8.7246e+10
Belarus	7.20831e+10
Belgium	2.48932e+10
Benin	3.484e+10
Bhutan	3.44626e+10
Bolivia	1.92406e+09
Bosnia and Herzegovina	2.85815e+10
Botswana	1.79109e+10
Brazil	2.93399e+11
Brazilian Island	2.82494e+06
Bulgaria	9.71734e+08
Burkina Faso	1.31326e+11
Cabo Verde	3.11033e+08
Cambodia	6.03293e+10
Cameroon	1.16106e+11
Canada	5.26254e+11
Central African Republic	1.68797e+11
Chad	4.06191e+11
Chile	2.54993e+11
China	4.86118e+12
Colombia	3.40133e+08
Croatia	3.61356e+10
Cuba	1.35176e+09
Cyprus	4.25188e+09
Cyprus No Mans Area	6.28839e+07
Czechia	5.84918e+10
Democratic Republic of the Congo	1.72442e+11
Denmark	3.67429e+11
Djibouti	5.17111e+08
Equatorial Guinea	1.41721e+07
Estonia	3.78043e+10
Ethiopia	4.33835e+10
Fiji	1.03037e+10
Finland	5.07144e+10
France	2.44696e+11
Gabon	5.97989e+08
Gambia	9.95322e+09
Georgia	5.83196e+10
Germany	1.59475e+11
Ghana	8.63413e+09
Greece	7.997e+10
Guatemala	1.73417e+09
Guinea	1.62239e+11
Guinea-Bissau	1.38211e+10
Hungary	3.60903e+09
Iceland	8.71539e+10
India	2.49025e+12
Iran	5.44263e+10
Iraq	2.5306e+10
Ireland	5.26258e+10
Israel	1.13702e+10
Italy	2.50416e+11
Ivory Coast	2.29656e+10
Japan	3.59987e+11
Jordan	1.43764e+09
Kazakhstan	3.47373e+08
Kosovo	1.37361e+09
Kyrgyzstan	1.1128e+08
Laos	1.65399e+11
Latvia	5.42151e+10
Lebanon	8.85954e+09
Lesotho	2.80019e+07
Libya	4.2692e+09
Liechtenstein	1.3725e+08
Lithuania	2.73017e+10
Luxembourg	2.32888e+09
Madagascar	1.03919e+11
Malawi	1.11213e+11
Mali	3.68025e+11
Malta	2.70896e+08
Mauritania	2.05939e+10
Mauritius	1.75223e+09
Mexico	3.78933e+11
Moldova	1.96338e+09
Monaco	3.96398e+06
Mongolia	4.83068e+10
Montenegro	1.10804e+10
Morocco	2.31788e+10
Mozambique	2.65269e+11
Myanmar	4.48057e+11
Namibia	3.83745e+10
Nepal	1.20095e+11
Netherlands	1.51366e+10
New Zealand	1.3046e+11
Niger	1.29354e+11
Nigeria	5.3432e+11
North Korea	1.20895e+11
North Macedonia	3.35818e+09
Northern Cyprus	8.28906e+08
Norway	2.37651e+11
Oman	3.0152e+09
Pakistan	1.6301e+11
Paraguay	2.91698e+10
Peru	4.53365e+10
Philippines	4.80389e+09
Poland	1.56485e+11
Portugal	6.82376e+10
Republic of Serbia	5.54868e+09
Republic of the Congo	2.69622e+07
Romania	6.25263e+10
Russia	6.4186e+11
San Marino	6.03171e+07
Senegal	1.21561e+11
Sierra Leone	1.00203e+09
Slovakia	2.25964e+10
Slovenia	1.96711e+10
Somaliland	7.47308e+07
South Africa	5.13133e+09
South Korea	9.46529e+10
South Sudan	4.14536e+10
Spain	1.12053e+11
Sudan	1.45971e+11
Sweden	1.15497e+11
Switzerland	3.67011e+10
Syria	1.36386e+10
Taiwan	3.13396e+10
Tajikistan	3.15465e+10
Thailand	3.31206e+11
The Bahamas	7.76695e+09
Togo	8.86978e+06
Tonga	2.45123e+08
Tunisia	8.8716e+09
Turkey	2.25503e+11
Turkmenistan	1.60838e+08
Ukraine	1.52631e+11
United Arab Emirates	7.88364e+07
United Kingdom	1.30937e+11
United Republic of Tanzania	1.03287e+11
United States of America	2.63626e+12
Uruguay	5.63252e+10
Uzbekistan	9.21364e+09
Vanuatu	1.41155e+09
Vatican	12203.8
Vietnam	2.08765e+11
Zambia	7.06799e+11
Zimbabwe	2.37496e+11	Total Area (Presence) [Sq.km]	24735876
